# Supplementary material for: Clinical Characteristics, Care Trajectories and Mortality Rate of SARS-CoV-2 Infected Cancer Patients: A Multicenter Cohort Study
Source: MDPI journal article supplement (doi:10.3390/cancers13194749), 2021-09-23
Supplement: s1 [file s1]

The data used in the preparation of this article were obtained from the AP-HP Covid Clinical Data Warehouse (CDW). As such, the members of the AP-HP Covid CDW initiative (ACCI) contributed to the design and implementation of the database but did not participate in the analysis or writing of this report. A complete listing of ACCI members can be found at: <https://eds.aphp.fr/covid-19> and below.

Data used regarding cancer characteristics were obtained from the AP-HP CDW and were previously supplied by AP-HP oncologists. As such, the members of the Groupe Cancer AP-HP contributed to the implementation of the database but did not participate in the analysis or writing of this report. A complete listing of Groupe Cancer AP-HP members can be found in List S2.

#### List of co-authors

#### **\*AP-HP / Universities / Inserm COVID-19 research collaboration, scientific committee**

Philippe-Gabriel Steg, Tabassome Simon, Florence Favrel-Feuillade, Yannick Vacher, Yazdan Yazdanpanah, Hélène Espérou, Odile Launay, Dominique Costagliola, Vincent Calvez, Elie Azoulay, Bruno Riou, Claire Hassen Khodja, Sylvie Bastuji-Garin.

#### **#Cancer AP-HP Group COVID-19 task force,**

Lorea Aguinaga, Jérôme Alexandre, Thierry André, Thomas Aparicio, Jalal Assouad, Frederic Batteux, Anne-Sophie Bats, Jean-Baptiste Bachet, Yazid Belkacemi, Chloé Bertolus, Marc-Olivier Bitker, Nicolas Boissel, Jacques Cadranel, Marine Camus Duboc, Stanisals Chaussade, Romain Coriat, Sylvain Choquet, Romain Coriat, Philippe Cornu, Stéphane Culine, Olivier Cussenot, Emile Darai, Jean-Yves Delattre, Hervé Dombret, Bertrand Dousset, Catherine Durdux, Marc Espié, Pierre Fenaux, Gilles Galula, Philippe Giraud, Joseph Gligorov, François Goldwasser, Jérémie Gueye Lefevre, Corinne Haioun, Pascal Hammel, Christophe Hennequin, Olivier Hermine, Florence Huguet, Olivier Lambotte, Pierre Laurent-Puig, Armelle Lavole, Céleste Lebbe, Véronique Leblond, Laurence Leenhardt, Guy Leverger, Jean-Pierre Lotz, Philippe Maingon, Fabrice Menegaux, Mohamad Mohty, Diaretou Ndiaye-Gueye, Stéphane Oudard, Yann Parc, Arnaud Petit, Robert Ratiney, Olivier Rosmorduc, Philippe Ruzsniowski, Rémi salomon, Marc Sanson, Olivier Scaton, Gérard Socie, Jean-Philippe Spano, Julien Taieb, Catherine Thieblemont, Isabelle Thomassin, Christophe Tournigand, Catherine Uzan, Jean-Christophe Vaillant, Marie Wislez, Gerard Zalcman, Laurent Zelek

#### **°AP-HP Covid CDW Initiative (ACCI)**

| Name          | Surname     | Affiliation                                                                                                      |
|---------------|-------------|------------------------------------------------------------------------------------------------------------------|
| Ancel         | Pierre-Yves | APHP Paris University Center                                                                                     |
| Bauchet       | Alain       | APHP Saclay University                                                                                           |
| Beeker        | Nathanael   | APHP Paris University Center                                                                                     |
| Benoit        | Vincent     | WIND Department APHP Greater Paris University Hospital                                                           |
| Bernaux       | Mélodie     | Strategy and transformation department, APHP Greater Paris University Hospital                                   |
| Bellamine     | Ali         | WIND Department APHP Greater Paris University Hospital                                                           |
| Bey           | Romain      | WIND Department APHP Greater Paris University Hospital                                                           |
| Bourmaud      | Aurélie     | APHP Paris University North                                                                                      |
| Bréant        | Stéphane    | WIND Department APHP Greater Paris University Hospital                                                           |
| Burgun        | Anita       | Department of Biomedical Informatics, HEGP, APHP Greater Paris University Hospital                               |
| Carrat        | Fabrice     | APHP Sorbonne University                                                                                         |
| Caucheteux    | Charlotte   | Université Paris-Saclay, Inria, CEA                                                                              |
| Champ         | Julien      | INRIA Sophia-Antipolis – ZENITH team, LIRMM, Montpellier, France                                                 |
| Cormont       | Sylvie      | WIND Department APHP Greater Paris University Hospital<br>WIND Department APHP Greater Paris University Hospital |
| Daniel        | Christel    | ; UMRS1142 INSERM                                                                                                |
| Dubiel        | Julien      | WIND Department APHP Greater Paris University Hospital                                                           |
| Ducloas       | Catherine   | APHP Paris Seine Saint Denis University Hospital                                                                 |
| Esteve        | Loic        | SED/SIERRA, Inria Centre de Paris                                                                                |
| Frank         | Marie       | APHP Saclay University                                                                                           |
| Garcelon      | Nicolas     | Imagine Institute                                                                                                |
| Gramfort      | Alexandre   | Université Paris-Saclay, Inria, CEA<br>WIND Department APHP Greater Paris University Hospital                    |
| Griffon       | Nicolas     | UMRS1142 INSERM                                                                                                  |
| Grisel        | Olivier     | Université Paris-Saclay, Inria, CEA                                                                              |
| Guilbaud      | Martin      | WIND Department APHP Greater Paris University Hospital                                                           |
| Hassen-Khodja | Claire      | Direction of the Clinical Research and Innovation, AP-HP                                                         |
| Hemery        | François    | APHP Henri Mondor University Hospital                                                                            |
| Hilka         | Martin      | WIND Department APHP Greater Paris University Hospital                                                           |
|               | Anne        |                                                                                                                  |
| Jannot        | Sophie      | Department of Biomedical Informatics, HEGP, APHP Greater Paris University Hospital                               |
| Lambert       | Jerome      | APHP Paris University North                                                                                      |
| Layese        | Richard     | APHP Henri Mondor University Hospital                                                                            |
| Leblanc       | Judith      | Clinical Research Unit, Saint Antoine Hospital, APHP Greater Paris University Hospital                           |
| Lebouter      | Léo         | WIND Department APHP Greater Paris University Hospital                                                           |
| Lemaitre      | Guillaume   | Université Paris-Saclay, Inria, CEA                                                                              |
| Leprovost     | Damien      | Clevy.io                                                                                                         |
| Lerner        | Ivan        | Department of Biomedical Informatics, HEGP, APHP Greater Paris University Hospital                               |
| Levi Sallah   | Kankoe      | APHP Paris University North                                                                                      |
| Maire         | Aurélien    | WIND Department APHP Greater Paris University Hospital                                                           |
|               | Marie-      |                                                                                                                  |
| Mamzer        | France      | President of the AP-HP IRB                                                                                       |
| Martel        | Patricia    | APHP Saclay University                                                                                           |
| Mensch        | Arthur      | ENS, PSL University                                                                                              |
| Moreau        | Thomas      | Université Paris-Saclay, Inria, CEA                                                                              |

|            |           |                                                                                         |
|------------|-----------|-----------------------------------------------------------------------------------------|
| Neuraz     | Antoine   | Department of Biomedical Informatics, HEGP, APHP Greater Paris University Hospital      |
| Orlova     | Nina      | WIND Department APHP Greater Paris University Hospital                                  |
| Paris      | Nicolas   | WIND Department APHP Greater Paris University Hospital                                  |
| Rance      | Bastien   | Department of Biomedical Informatics, HEGP, APHP Greater Paris University Hospital      |
| Ravera     | Hélène    | WIND Department APHP Greater Paris University Hospital                                  |
| Rozes      | Antoine   | APHP Sorbonne University                                                                |
| Salamanca  | Elisa     | WIND Department APHP Greater Paris University Hospital                                  |
| Sandrin    | Arnaud    | WIND Department APHP Greater Paris University Hospital                                  |
| Serre      | Patricia  | WIND Department APHP Greater Paris University Hospital                                  |
| Tannier    | Xavier    | Sorbonne University                                                                     |
| Treluyer   | Jean-Marc | APHP Paris University Center                                                            |
| Van Gysel  | Damien    | APHP Paris University North                                                             |
| Varoquaux  | Gael      | Université Paris-Saclay, Inria, CEA, Montréal Neurological Institute, McGill University |
| Vie        | Jill-Jênn | Sequel, Inria Lille                                                                     |
| Wack       | Maxime    | Department of Biomedical Informatics, HEGP, APHP Greater Paris University Hospital      |
| Wajsburt   | Perceval  | Sorbonne University                                                                     |
| Wassermann | Demian    | Université Paris-Saclay, Inria, CEA                                                     |
| Zapletal   | Eric      | Department of Biomedical Informatics, HEGP, APHP Greater Paris University Hospital      |
