# Supplementary material for: Clinical Characteristics, Care Trajectories and Mortality Rate of SARS-CoV-2 Infected Cancer Patients: A Multicenter Cohort Study
Source: MDPI journal article supplement (doi:10.3390/cancers13194749), 2021-09-23
Supplement: s1 [file s1]

**Supplementary List 2.** List of the 39 hospitals that make-up Assistance Publique-Hôpitaux de Paris.

Hôpital Adélaïde-Hautval, Val-d'Oise, Ile de France  
Hôpital Albert-Chenevier, Val-de-Marne, Ile de France  
Hôpital Ambroise-Paré, Hauts-de-Seine, Ile de France  
Hôpital Antoine-Béclère, Hauts-de-Seine, Ile de France  
Hôpital Armand-Trousseau, Paris, Ile de France  
Hôpital Avicenne, Seine-Saint-Denis, Ile de France  
Hôpital Beaujon, Seine-Saint-Denis, Ile de France  
Hôpital Bicêtre, Val-de-Marne, Ile de France  
Hôpital Bichat-Claude Bernard, Paris, Ile de France  
Hôpital Bretonneau, Paris, Ile de France  
Hôpital Broca, Paris, Ile de France  
Hôpital Charles-Foix, Val-de-Marne, Ile de France  
Hôpital Cochin, Paris, Ile de France  
Hôpital Corentin-Celton, Seine-Saint-Denis, Ile de France  
Hôpital Emile-Roux, Val-de-Marne, Ile de France  
Hôpital Européen Georges-Pompidou, Paris, Ile de France  
Hôpital Fernand-Widal, Paris, Ile de France  
Hôpital Georges-Clémenceau, Essone, Ile de France  
Hôpital Henri-Mondor, Paris, Ile de France  
Hôpital Hôtel-Dieu, Paris, Ile de France  
Hôpital Jean-Verdier, Seine-Saint-Denis, Ile de France  
Hôpital Joffre-Dupuytren, Essone, Ile de France  
Hôpital La Roche-Guyon, Val-d'Oise, Ile de France  
Hôpital La Rochefoucauld, Paris, Ile de France  
Hôpital Lariboisière, Paris, Ile de France  
Hôpital Louis-Mourier, Hauts-de-Seine, Ile de France  
Hôpital Maritime de Berck, Pas-de-Calais, Hauts-de-France  
Hôpital Necker-Enfants Malades, Paris, Ile de France  
Hôpital Paul-Brousse, Paris, Ile de France  
Hôpital Raymond-Poincaré, Hauts-de-Seine, Ile de France  
Hôpital René-Muret, Seine-Saint-Denis, Ile de France  
Hôpital Robert-Debré, Paris, Ile de France  
Hôpital Rothschild, Paris, Ile de France  
Hôpital Saint-Antoine, Paris, Ile de France  
Hôpital Saint-Louis, Paris, Ile de France  
Hôpital Sainte-Perrine, Paris, Ile de France  
Hôpital Tenon, Paris, Ile de France  
Hôpital Pitié-Salpêtrière, Paris, Ile de France  
Hôpital Vaugirard, Paris, Ile de France
