# Supplementary material for: Clinical Characteristics, Care Trajectories and Mortality Rate of SARS-CoV-2 Infected Cancer Patients: A Multicenter Cohort Study
Source: MDPI journal article supplement (doi:10.3390/cancers13194749), 2021-09-23
Supplement: s1 [file s1]

**Table S2.** COVID-19 treatments among patients with cancer and confirmed COVID 19.

| COVID-19 treatment (%) | All patients<br>(N= 1148) | Patients who<br>survived<br>(N = 765) | Patients who died<br>(N = 383) | P value* |
|------------------------|---------------------------|---------------------------------------|--------------------------------|----------|
| Admission to ICU       | 217 (18.9)                | 126 (16.5)                            | 91 (23.8)                      | 0.004    |
| Mechanical ventilation | 33 (2.9)                  | 5 (1.1)                               | 28 (4.1)                       | <0.0001  |
| Corticosteroids (%)    | 117 (10.2)                | 29 (6.2)                              | 88 (12.9)                      | <0.0001  |
| <i>Missing data</i>    | 214 (18.6)                | 106 (22.7)                            | 108 (15.8)                     |          |
| Immunotherapy          | 42 (3.7)                  | 11 (2.4)                              | 31 (4.5)                       | 0.002    |
| <i>Missing data</i>    | 214 (18.6)                | 107 (23)                              | 107 (15.7)                     |          |
| Other**                | 330 (28.7)                | 107 (23)                              | 223 (32.7)                     | <0.0001  |
| <i>Missing data</i>    | 125 (18.7)                | 106 (22.7)                            | 109 (16)                       |          |

ICU: intensive care unit

\* Groups were compared excluding missing data and using Pearson chi-square or Student T test as appropriate.

\*\* : hydroxychloroquin, antivirals, macrolides
