# Supplementary material for: Clinical Characteristics, Care Trajectories and Mortality Rate of SARS-CoV-2 Infected Cancer Patients: A Multicenter Cohort Study
Source: MDPI journal article supplement (doi:10.3390/cancers13194749), 2021-09-23
Supplement: s1 [file s1]

**Table S1.** Identification of cancer patients and comorbidities among the AP-HP warehouse

|                                                    | ICD-10 Codes*                             | AMELI Codes**                                                                                     |
|----------------------------------------------------|-------------------------------------------|---------------------------------------------------------------------------------------------------|
| <b>Cancer</b>                                      |                                           |                                                                                                   |
| Cancer                                             | C00-C97;Z85;B21;D611;Y43;Z08;Z5101;Z511   | All codes including 'brachytherapy', 'irradiation', 'antitumoral drug', 'malignant tumor surgery' |
| Metastatic cancer                                  | C77-C80                                   |                                                                                                   |
| Non-metastatic cancer                              | Cancer code without C77-C80               |                                                                                                   |
| Hematologic malignancies                           | C81-C96                                   |                                                                                                   |
| Digestive cancer                                   | C15-C26                                   |                                                                                                   |
| Urologic cancer                                    | C61-C68                                   |                                                                                                   |
| Gynecologic cancer                                 | C51-58                                    |                                                                                                   |
| Pulmonary cancer                                   | C34                                       |                                                                                                   |
| Breast cancer                                      | C50                                       |                                                                                                   |
| Primary Central Nervous System cancer              | C70-C72                                   |                                                                                                   |
| Head and neck cancer                               | C00-C14;C30-C32                           |                                                                                                   |
| Thyroid cancer                                     | C73                                       |                                                                                                   |
| Melanoma                                           | C43-C44                                   |                                                                                                   |
| <b>Comorbidities</b>                               |                                           |                                                                                                   |
| Hypertension                                       | I10-I13 ; I15                             |                                                                                                   |
| Coronary heart disease or congestive heart failure | I11;I13;I20-I25;I50;Z95                   |                                                                                                   |
| Cardiac arrhythmia                                 | I47-I49                                   |                                                                                                   |
| Diabetes mellitus                                  | E10-E14                                   |                                                                                                   |
| Hyperlipidemia                                     | E78                                       |                                                                                                   |
| Obesity                                            | E66;T8550                                 |                                                                                                   |
| Chronic obstructive pulmonary disease              | I27;J40-J47;J60-J70                       |                                                                                                   |
| Smoker or history of smoking                       | F17;Z587;Z716;Z720                        |                                                                                                   |
| Chronic kidney disease                             | I12-I13;N03;N05;N18-N19;N25;Z49;Z940;Z992 |                                                                                                   |

\*ICD-10 indicates International Classification of Diseases, 10th edition.

\*\*CCAM, 63th edition
