# Supplementary material for: Clinical Characteristics, Care Trajectories and Mortality Rate of SARS-CoV-2 Infected Cancer Patients: A Multicenter Cohort Study
Source: Cancers (Basel). 2021 Sep 23;13(19):4749. doi: 10.3390/cancers13194749 (PMC8507538; doi:10.3390/cancers13194749)
Supplement: Supplementary file 1 [file cancers-13-04749-s001.zip]

Archive with 4 entries (4 files):
- Supplementary list 1.pdf
- Supplementary list 2.pdf
- Supplementary table 1.pdf
- Supplementary table 2.pdf
